# Supplementary material
Source: PubMed Central journal article supplement (PMC8407450)
Supplement: NIHMS1734305-supplement-Supplemental_Table_1.pdf [file NIHMS1734305-supplement-Supplemental_Table_1.pdf]

**Supplemental Table 1.** P-values of main effects of sleep and, when applicable, sleep x week interaction, on outcome variables in adjusted and unadjusted analyses with condition (HS vs SR) or TST (continuous) as predictors.

| Outcome                     | Effect       | Study condition,<br>unadjusted | Study condition,<br>adjusted | Total sleep time,<br>unadjusted | Total sleep time,<br>adjusted |
|-----------------------------|--------------|--------------------------------|------------------------------|---------------------------------|-------------------------------|
| Systolic blood<br>pressure  | Sleep        | 0.061                          | 0.998                        | 0.349                           | 0.271                         |
|                             | Sleep x week | <b>0.005</b>                   | 0.350                        | <b>0.046</b>                    | <b>0.036</b>                  |
| Diastolic blood<br>pressure | Sleep        | 0.193                          | 0.903                        | 0.233                           | 0.233                         |
|                             | Sleep x week | 0.158                          | 0.743                        | 0.110                           | 0.110                         |
| Systolic blood<br>pressure  | Daily        | 0.066                          | 0.088                        | 0.291                           | 0.267                         |
|                             | Wake         | 0.072                          | 0.108                        | 0.415                           | 0.421                         |
|                             | Sleep        | 0.591                          | 0.19                         | 0.980                           | 0.929                         |
| Diastolic blood<br>pressure | Daily        | 0.059                          | 0.063                        | 0.469                           | <b>0.024</b>                  |
|                             | Wake         | <b>0.036</b>                   | <b>0.045</b>                 | <b>0.033</b>                    | <b>0.021</b>                  |
|                             | Sleep        | 0.655                          | 0.666                        | 0.741                           | 0.766                         |
|                             | Daily        | <b>0.039</b>                   | <b>0.038</b>                 | 0.373                           | 0.258                         |

|                        |       |              |              |       |              |
|------------------------|-------|--------------|--------------|-------|--------------|
| Mean arterial pressure | Wake  | <b>0.024</b> | <b>0.023</b> | 0.328 | <b>0.018</b> |
|                        | Sleep | 0.571        | 0.584        | 0.808 | 0.868        |

P-values are from mixed-model analyses with participant as random effect; adjusted analyses included fraction of wear time in physical activity (activity counts/hours of wear time). When applicable, data were adjusted for phase order.
