# Supplementary material
Source: PubMed Central journal article supplement (PMC8407450)
Supplement: NIHMS1734305-supplement-Supplemental_Table_3.pdf [file NIHMS1734305-supplement-Supplemental_Table_3.pdf]

**Supplemental Table 3.** Univariate Associations between Psychological Factors and Sleep in the Community-based

Cohort (n=237)

| Sleep measures                 | Comparisons           | PSS-4 |                 | GPSS-4 |                 | PHQ-2 |                 | BRS  |                 | LEC  |                 |
|--------------------------------|-----------------------|-------|-----------------|--------|-----------------|-------|-----------------|------|-----------------|------|-----------------|
|                                |                       | OR    | <i>P</i> -value | OR     | <i>P</i> -value | OR    | <i>P</i> -value | OR   | <i>P</i> -value | OR   | <i>P</i> -value |
| Sleep Duration                 | <7 vs ≥7 h/night      | 2.61  | <0.001*         | 2.21   | 0.003*          | 2.23  | 0.003*          | 0.65 | 0.106           | 2.97 | <0.001*         |
| Insomnia                       | ≥8 vs <8              | 4.64  | <0.001*         | 2.63   | <.001*          | 2.08  | 0.008*          | 0.45 | 0.004*          | 2.05 | 0.009*          |
| Pittsburgh Sleep Quality Index | >5 vs ≤5              | 2.33  | 0.003*          | 2.04   | 0.010*          | 1.84  | 0.026*          | 0.48 | 0.007*          | 2.52 | 0.001*          |
| Obstructive Sleep Apnea        | High-risk vs low-risk | 2.93  | 0.009*          | 2.46   | 0.020*          | 1.77  | 0.115           | 0.80 | 0.537           | 4.43 | <0.001*         |
| Snore                          | Yes vs no             | 1.45  | 0.204           | 1.33   | 0.326           | 1.32  | 0.336           | 1.56 | 0.137           | 2.30 | 0.005*          |

Abbreviations: BRS, Brief Resilience Scale; LEC, Life Events Checklist; GPSS-4, global perceived stress scale; PHQ-2, patient health questionnaire; PSS-4, perceived stress scale.

\**P*<0.05
